# Supplementary material for: Metamorphic P–T paths of Archean granulite facies metasedimentary lithologies from the eastern Beartooth Mountains of the northern Wyoming Province, Montana, USA: constraints from quartz-in-garnet (QuiG) Raman elastic barometry, geothermobarometry, and thermodynamic modeling
Source: Copernicus journal article supplement (doi:10.5194/ejm-35-499-2023), 2023-07-18
Supplement: Supplementary file 1 [file ejm-35-499-2023-supplement.zip]

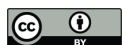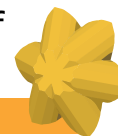

*Supplement of*

**Metamorphic  $P$ – $T$  paths of Archean granulite facies metasedimentary lithologies from the eastern Beartooth Mountains of the northern Wyoming Province, Montana, USA: constraints from quartz-in-garnet (QuiG) Raman elastic barometry, geothermobarometry, and thermodynamic modeling**

Larry Tuttle and Darrell J. Henry

*Correspondence to:* Larry Tuttle (lcliff4@lsu.edu)

- [ejm-35-499-2023-supplement-title-page.pdf](#)
- Tuttle-Henry\_Prograde\_Manuscript\_Supplement
  - Tuttle-Henry-ProgradeManuscript-S1.pdf
  - Tuttle-Henry-Prograde\_ManuscriptS2-7.xlsx

The copyright of individual parts of the supplement might differ from the article licence.
